# Supplementary material for: SOX2 as a novel contributor of oxidative metabolism in melanoma cells
Source: PubMed Central journal article supplement (PMC6249961; doi:10.1186/s12964-018-0297-z), 2018-11-22
Supplement: 12964_2018_297_MOESM1_ESM.pdf [file 12964_2018_297_MOESM1_ESM.pdf]

## Additional file 1

### SOX2 as a novel contributor of oxidative metabolism in melanoma cells.

Elena Andreucci<sup>1\*</sup>, Silvia Pietrobono<sup>2\*</sup>, Silvia Peppicelli<sup>1</sup>, Jessica Ruzzolini<sup>1</sup>, Francesca Bianchini<sup>1</sup>, Alessio Biagioni<sup>1</sup>, Barbara Stecca<sup>2</sup> and Lido Calorini<sup>1,3</sup>.

<sup>1</sup>Department of Clinical and Experimental Biomedical Sciences “Mario Serio”, Section of Experimental Pathology and Oncology, University of Florence, Florence, Italy. <sup>2</sup>Core Research Laboratory, Institute for Cancer Research and Prevention (ISPRO), Florence, Italy. <sup>3</sup>Center of Excellence for Research, Transfer and High Education DenoTHE University of Florence, Florence, Italy.

\* These authors contributed equally to this work.

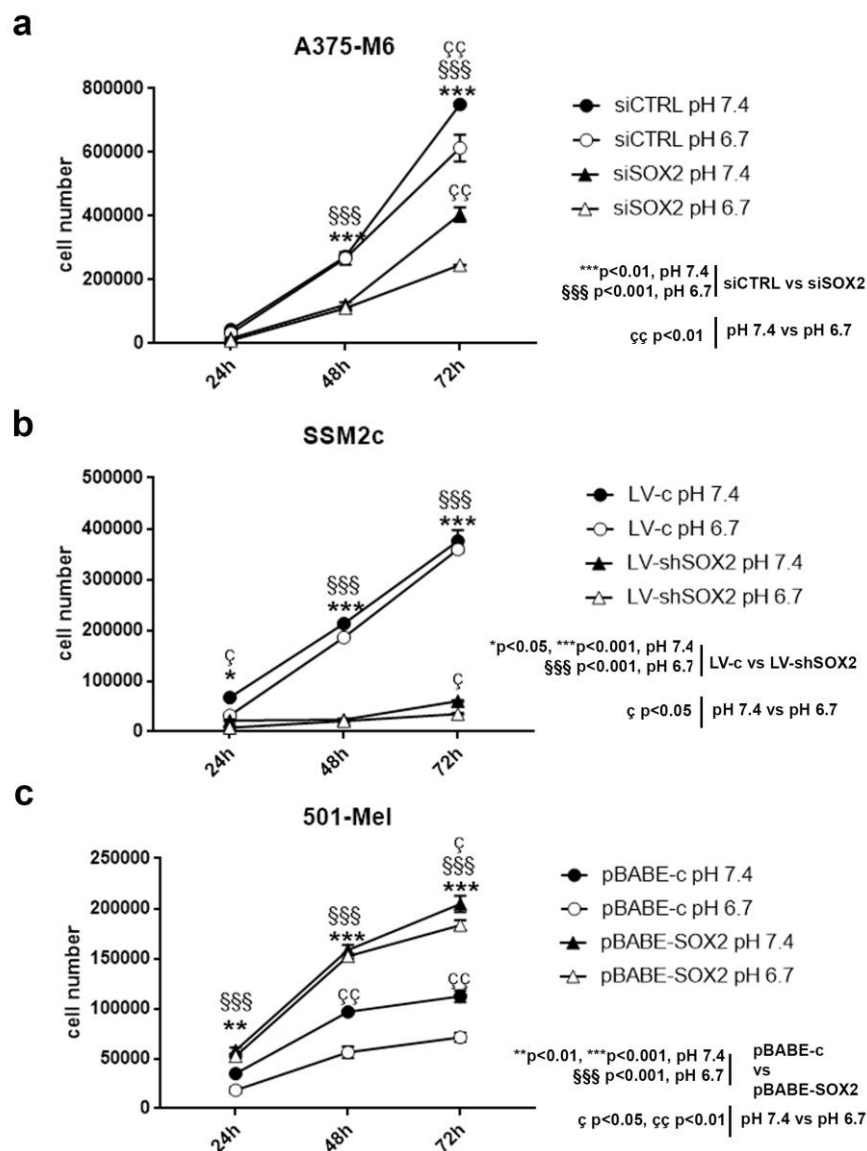

**Figure S1 Growth curves of melanoma cells with SOX2 depletion or over-expression under standard and acidic condition.** Proliferation of SOX2-depleted A375-M6 (a) and SSM2c (b), and SOX2-overexpressed 501-Mel (c) grown for 24, 48 and 72 hours at pH 7.4 and 6.7. GraphPad Prism software, Two-way ANOVA, N=3.

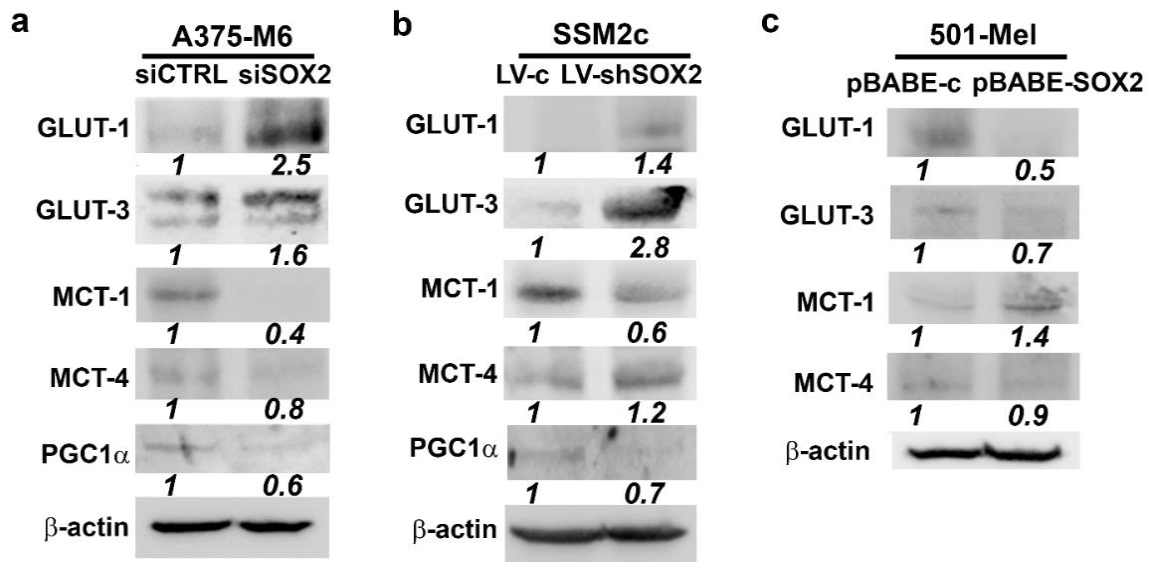

**Figure S2 Western blotting of a panel of glycolysis- and OxPhos-related proteins**

**after SOX2 silencing and over-expression in melanoma cells.** a) Western blot of GLUT-1 ( $p < 0.01$ ), GLUT-3 ( $p < 0.05$ ), MCT-1 ( $p < 0.01$ ), MCT-4 (ns) and PGC1 $\alpha$  ( $p < 0.05$ ) in A375-M6 siCTRL and siSOX2 at pH 7.4. T-test, N=3. b) Western blot of GLUT-1, GLUT-3, MCT-1, MCT-4 and PGC1 $\alpha$  in SSM2c LV-c and LV-shSOX2 at pH 7.4.  $p < 0.05$ , T-test, N=3. c) Western blot of GLUT-1 ( $p < 0.01$ ), GLUT-3 ( $p < 0.05$ ), MCT-1 ( $p < 0.01$ ), and MCT-4 (ns) in 501-Mel pBABE-c and pBABE-SOX2 at pH 7.4. T-test, N=3. Quantification of protein expression is shown in italic.
